# Supplementary material for: Comparing Two Transcranial Temporal Interference Stimulation Protocols for Depressive Disorder: a Secondary Data Analysis
Source: Research Square preprint supplement (doi:10.21203/rs.3.rs-8637906/v1), 2026-02-10
Supplement: Supplementary file 1 [file 88664d47b89556c5b149c25b.docx]

**Supplementary**

**Comparing Two Transcranial Temporal Interference Stimulation Protocols for Depressive Disorder: a Secondary Data Analysis**

Huijie Lei1, Simeng Zhang2, Mulan Huang2, Liwen Feng2, Hengfen Gong2, Qingyuan Xue3, Sijia Tang4, Haiyan Jin3, Jingjing Zhang3, Odin van der Stelt1, 5, Yong Lu1, 5, Chencheng Zhang1, 5, Yiru Fang3, 6, 7, 8

Table S1. Study design of the two studies of interest

|  | Li et al., study | Wu et al., study |
| --- | --- | --- |
| Participants inclusion criteria | HAMD ≥ 17 | HAMD ≥ 14 |
| Number of participants in the final analysis | N = 37  Two clinical centers | N = 30  One clinical centers |
| Study design | Randomized, double-blind, sham-controlled | Single group pre/post intervention |
| tTIS session arrangement | Week 1: 2 sessions  Week 2: 2 sessions  Week 3:1 session | Week 1: 5 sessions |
| Measurement time points | Baseline  After two sessions  One-week after 5 sessions  Four-week follow-up 5 sessions  Five-week follow-up 5 sessions | Baseline  Immediately after 5 sessions  One-week follow-up 5 sessions  Four-week follow-up 5 sessions |
| Each tTIS session duration | 20 minute | 20 minute |
| Assessment for depression and anxiety | QIDS-s  HAMD  HAMA | MADRS  QIDS-s  HAMD  HAMA  GAD |

HAMD= Hamilton Rating Scale for Depression; HAMA = Hamilton Anxiety Rating Scale; MADRS = Montgomery-Asberg Depression Rating Scale; QIDS-s = Quick Inventory of Depressive Symptomatology-Self-Report; GAD = Generalized Anxiety Disorder

Table S2. Study design of current study

|  | Less intensive protocol | Intensive protocol |
| --- | --- | --- |
| Number of participants in the final analysis | N = 20  One clinical centers | N = 30  One clinical centers |
| Measurement time points | T0: baseline  T1: after 5 tTIS sessions  (one week after 5 tTIS sessions)  T2: 1 week follow-up T1  T3: 4 week follow-up T1 | T0: baseline  T1: after 5 tTIS sessions (immediately after 5 tTIS sessions)  T2: 1 week follow-up T1  T3: 4 week follow-up T1 |
| Missing data | None | HAMA: missing data (n=1) at T1, missing data (n=3) at T2;  HAMD: missing data (n=3) at T2, |

The study encountered minimal missing data in the longitudinal assessments. Little's missing completely at random (MCAR) test (ᵡ2 = 17.56, df = 17, p = .417) indicated an acceptable missing data pattern. Comparative analyses revealed no significant differences in demographic characteristics between participants who completed all assessments and those with missing data (all p > .05).

**Participants exclusion criteria**

Eligible participants were aged 18 to 65 years and met the diagnostic criteria for MDD according to the Diagnostic and Statistical Manual of Mental Disorders, Fifth Edition (DSM-5), confirmed by senior psychiatrists at the hospitals. Inclusion required no changes in antidepressant medication for at least 30 days prior to enrollment and throughout the study period. Participants were required to demonstrate adequate understanding of the study procedures and objectives, be capable of complying with the study protocol, and provide written informed consent. Individuals were excluded if they had a history of other major psychiatric disorders (e.g., schizophrenia), seizure disorder, organic brain disease, significant head trauma, or prior neurosurgery. Additional exclusion criteria included the presence of metallic implants (e.g., cranial or cardiac), prior electroconvulsive therapy or other neuromodulation treatments (e.g., transcranial magnetic stimulation), high suicide risk as assessed by the investigator, pregnancy or breastfeeding, concurrent participation in other interventional clinical trials, or any other condition deemed by the investigator to make participation unsafe or inappropriate.
